# Supplementary material
Source: PubMed Central journal article supplement (PMC5033899)
Supplement: jciinsight-1-86131-s001.pdf [file jciinsight-1-86131-s001.pdf]

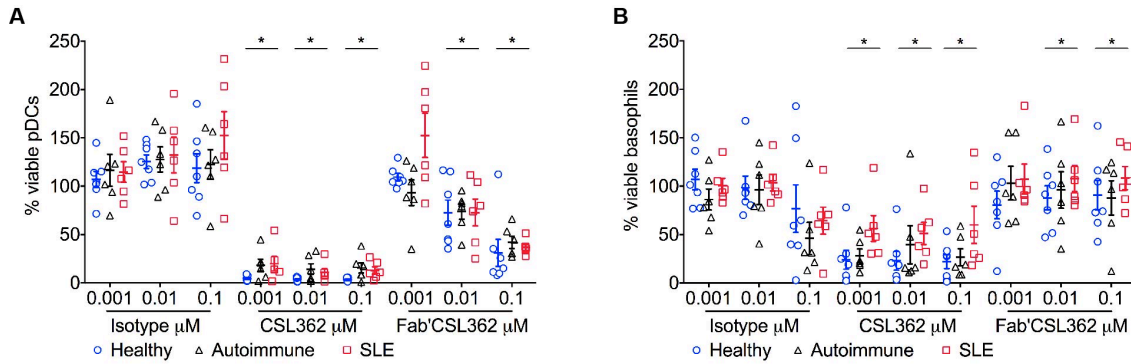

**Supplemental Figure 1. IL-3 blockade with Fab'CSL362 depletes plasmacytoid dendritic cells (pDCs), but not basophils, at higher doses.** Percentage of viable (A) pDCs (Sytox Blue-, Lin1-, HLADR+, BDCA2++) and (B) basophils (Sytox Blue-, Lin1-,CCR3+) following 24 hour culture with CSL362, Fab'CSL362 and isotype control at three doses (0.001  $\mu\text{M}$ , 0.01  $\mu\text{M}$  and 0.1  $\mu\text{M}$ ) compared to media alone. Data expressed as mean  $\pm$  SEM, \*  $p < 0.05$  (Mann Whitney test), compared to equivalent dose isotype control, from SLE (n = 6), autoimmune (n = 6) and healthy (n = 7) donors.

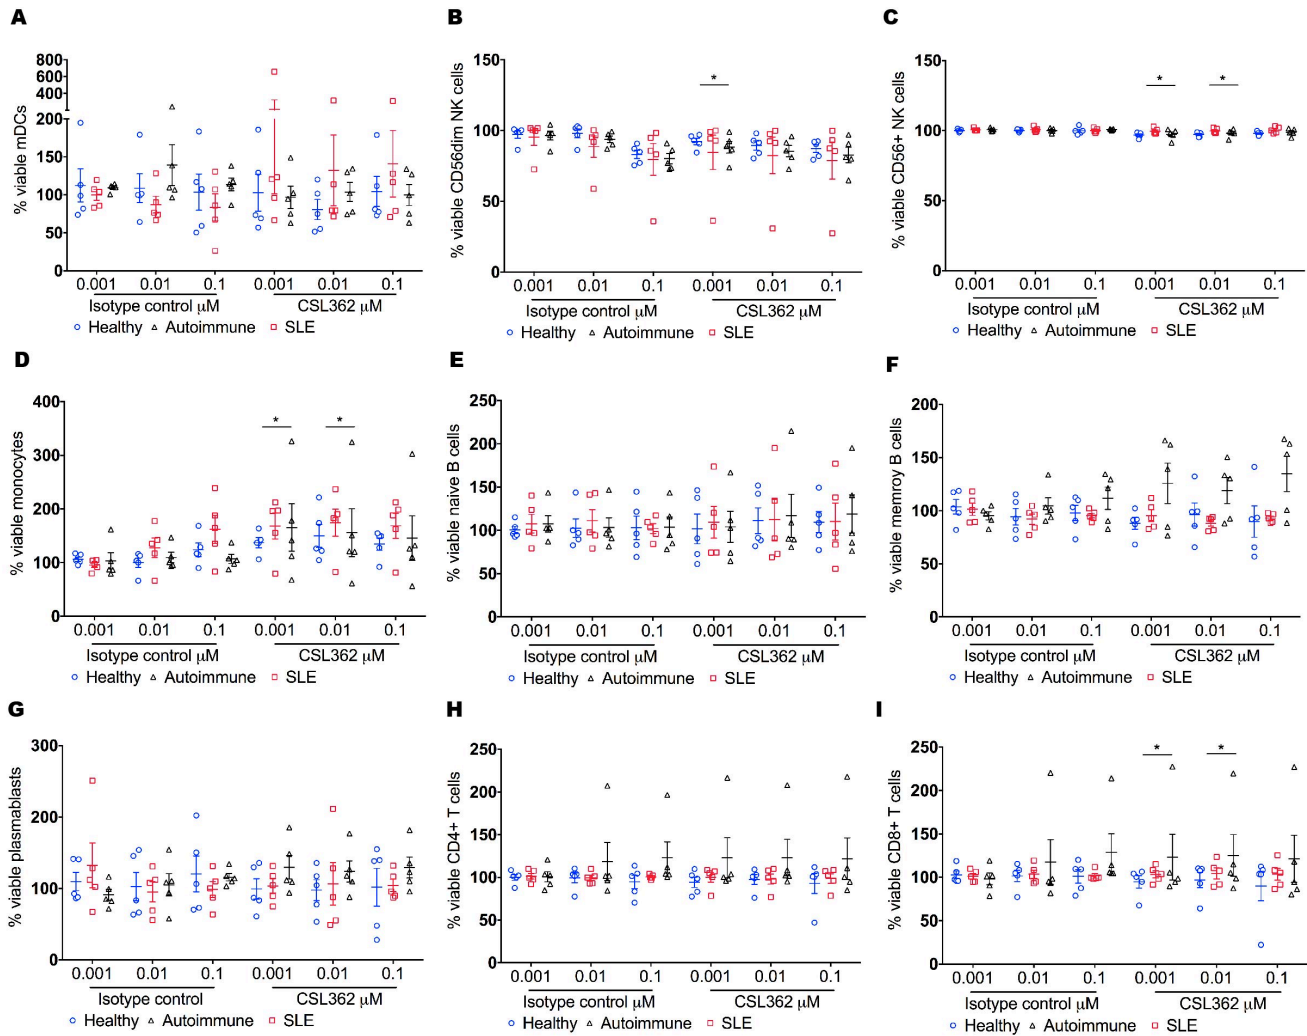

**Supplemental Figure 2. No depletion of myeloid dendritic cells (mDCs), monocytes, NK, B and T cell subsets with CSL362 treatment.** Percentage of viable (Sytox Blue-) (A) mDCs (Lin1-, HLADR+, CD11c+, BDCA2-, BDCA1+), (B) CD56 dim NK cells (CD14-, CD3-, CD56dim), (C) CD56+ NK cells (CD14-, CD3-, CD56+), (D) monocytes (CD3-, CD14+, CD11b+), (E) naïve B cells (CD19+, CD27-), (F) memory B cells (CD19+, CD27+), (G) plasmablasts (CD19+, CD27++), (H) CD4+ T cells (CD3-, CD4+, CD8-) or (I) CD8+ T cells (CD3-, CD8+, CD4-), following 24 hour culture with CSL362 and isotype control at three doses (0.001  $\mu\text{M}$ , 0.01  $\mu\text{M}$  or 0.1  $\mu\text{M}$ ) compared to no treatment. Data expressed as mean  $\pm$  SEM, \*  $p < 0.05$  (Mann Whitney test), compared to equivalent dose isotype control from SLE, autoimmune and healthy donors (n = 5 each).

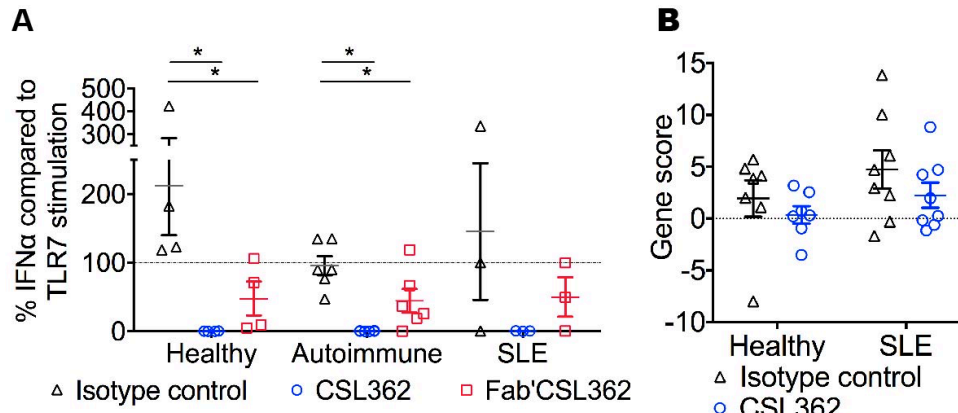

**Supplemental Figure 3. CSL362 inhibits TLR7-induced IFN $\alpha$  production and IFN-inducible gene expression.** (A) IFN $\alpha$  production from SLE (n = 3), autoimmune (n = 6) and healthy (n = 4) donor PBMCs and, (B) IFN-inducible gene expression, expressed as a single gene score for SLE (n = 8) and healthy (n = 7) donor PBMCs stimulated with TLR7 agonist imiquimod, following CSL362, Fab'CSL362 ((A) only) or isotype control pre-treatment. Gene score represents the average log<sub>2</sub> fold change in expression of 11 IFN-inducible genes (*IFI44L*, *IFIT1*, *IFIT3*, *IRF7*, *ISG15*, *MX1*, *MX2*, *OAS1*, *OAS2*, *SERPING1*, *XAF1*) for each treatment compared to no treatment. IFN-inducible gene expression determined by qPCR, IFN $\alpha$  production by ELISA. Data expressed as mean  $\pm$  SEM, \* p < 0.05 (Mann Whitney test).

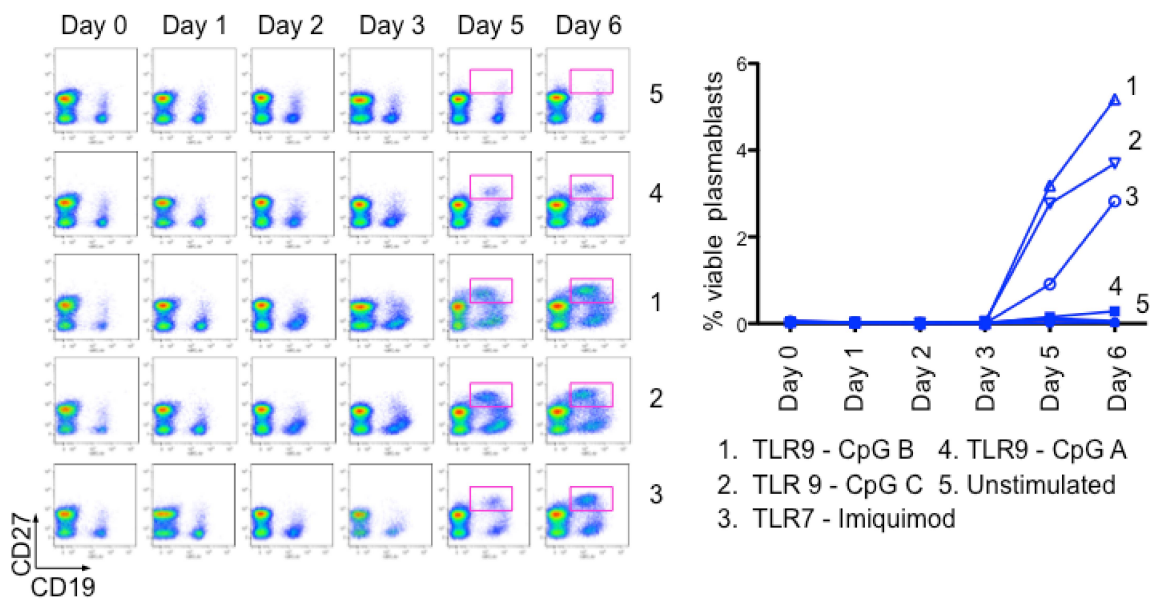

**Supplemental Figure 4. Expansion of plasmablasts is maximal after six days of stimulation with TLR7 and TLR9 agonists.** Representative data from a single healthy donor showing plasmablast (CD19+, CD27++) expansion in response to stimulation with TLR9 agonists CpG A, B and C, and TLR7 agonist imiquimod at days 0, 1, 2, 3, 5 and 6.

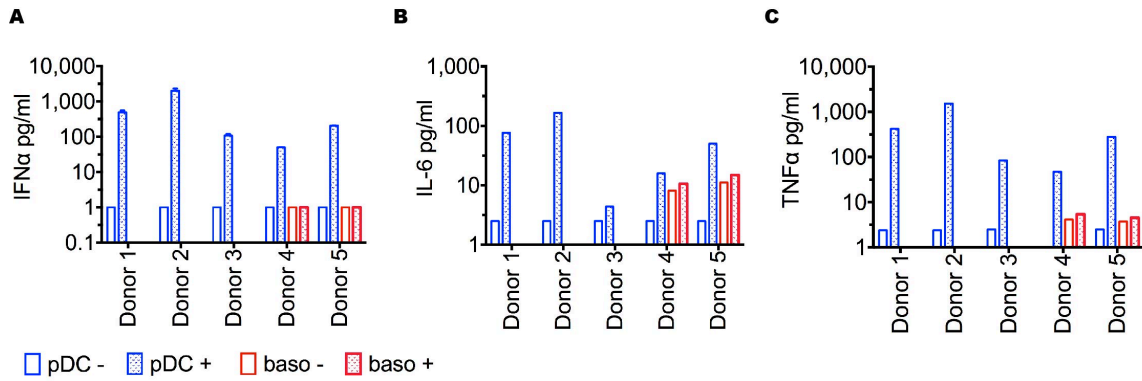

**Supplemental Figure 5. IFN $\alpha$ , IL-6 and TNF $\alpha$  are elevated in conditioned medium produced by stimulating pDCs with CpG C.** Levels of (A) IFN $\alpha$  (B) IL-6 and (C) TNF- $\alpha$  in conditioned medium, as determined by ELISA (IFN $\alpha$ ) and Luminex assay (IL-6 and TNF $\alpha$ ). pDC+ and pDC- represent conditioned media from isolated pDCs stimulated (+) or not (-) with CpG C. Baso+ and baso- represent the same for stimulated (+) or not (-) basophils. Levels of BAFF, GM-CSF, IFN $\gamma$ , MIP-3 $\alpha$ , TNF $\beta$ , IL-1 $\beta$ , IL-2, IL-3, IL-4, IL-5, IL-9, IL-10, IL-12p70, IL-13, IL-15, IL-17A, IL-17E/IL25, IL-17F, IL-21, IL-22, IL-23, IL-27, IL-28A, IL-31 and IL-33 were negligible.

**Supplemental Table 1. SLE donor characteristics**

|                                          |                      |
|------------------------------------------|----------------------|
| Age (mean, range)                        | 38.6, 18-70 (years)  |
| Gender (female, male)                    | 91, 9 (%)            |
| Disease duration (mean, range)           | 9.5, 0.25-25 (years) |
| Ethnicity                                |                      |
| - Caucasian                              | 65 (%)               |
| - Asian                                  | 32                   |
| - African                                | 3                    |
| SLEDAI (mean, range)                     | 5, 0-14              |
| Disease manifestations (current or past) |                      |
| - Rash                                   | 65 (%)               |
| - Arthritis                              | 76                   |
| - Cardiorespiratory                      | 41                   |
| - Renal                                  | 29                   |
| - Neuropsychiatric                       | 9                    |
| - Cytopenia                              | 50                   |
| - Positive anti-dsDNA antibody           | 79                   |
| - Hypocomplementaemia                    | 47                   |
| Current medications                      |                      |
| - No immunosuppression                   | 9 (%)                |
| - Steroids                               | 59                   |
| - Hydroxychloroquine                     | 76                   |
| - Methotrexate                           | 9                    |
| - Azathioprine                           | 24                   |
| - Mycophenolate                          | 12                   |
| - Rituximab                              | 3                    |

**Supplemental Table 2. Antibodies and reagents**

| <b>Application</b>                      | <b>Reagent</b>                                                     | <b>Company</b>    | <b>Category number</b> |
|-----------------------------------------|--------------------------------------------------------------------|-------------------|------------------------|
| CD123 expression                        | Anti-CD123 PE                                                      | BD Biosciences    | 555644                 |
| Plasmacytoid dendritic cells, basophils | Lineage cocktail 1 – Lin1 (CD3, CD14, CD16, CD19, CD20, CD56) FITC | BD Biosciences    | 340546                 |
| Plasmacytoid dendritic cells, basophils | Anti-HLADR APC                                                     | BD Biosciences    | 641393                 |
| Plasmacytoid dendritic cells, basophils | Anti-HLADR APCH7                                                   | BD Biosciences    | 561358                 |
| Plasmacytoid dendritic cells            | Anti-BDCA2 PECy7                                                   | E-Bioscience      | 25-9818-42             |
| Plasmacytoid dendritic cells            | Anti-BDCA2 APC                                                     | Miltenyi Biotec   | 130-090-905            |
| Basophils                               | Anti-CCR3 AF647                                                    | BD Biosciences    | 561745                 |
| Basophils                               | IgE FITC                                                           | KPL               | 02-10-04               |
| Myeloid dendritic cells                 | Anti-CD11c BV421                                                   | BD Biosciences    | 562561                 |
| Myeloid dendritic cells                 | Anti-CD11c APC                                                     | BD Biosciences    | 340544                 |
| Myeloid dendritic cells                 | Anti-BDCA1 PE                                                      | Miltenyi Biotec   | 130-098-007            |
| Myeloid dendritic cells                 | Anti-CD123 BV510                                                   | BD Biosciences    | 563702                 |
| NK cells, monocytes, T cells            | Anti-CD3 PECy7                                                     | BD Biosciences    | 557851                 |
| NK cells                                | Anti-CD56 FITC                                                     | BD Biosciences    | 340410                 |
| NK cells                                | Anti-Nkp46 APC                                                     | BD Biosciences    | 558051                 |
| NK cells                                | Anti-CD107a APCH7                                                  | BD Biosciences    | 561343                 |
| B cells                                 | Anti-CD19 PECy7                                                    | BD Biosciences    | 557835                 |
| B cells                                 | Anti-CD19 APC                                                      | BD Biosciences    | 555415                 |
| B cells                                 | Anti-CD20 FITC                                                     | BD Biosciences    | 556632                 |
| B cells                                 | Anti-CD27 V500                                                     | BD Biosciences    | 561222                 |
| B cells                                 | Anti-CD38 BV421                                                    | BD Biosciences    | 562444                 |
| B cells                                 | Anti-CD38 PECy7                                                    | BD Biosciences    | 335790                 |
| Monocytes, NK cells                     | Anti-CD14 APCH7                                                    | BD Biosciences    | 561384                 |
| Monocytes                               | Anti-CD14 APC                                                      | BD Biosciences    | 555399                 |
| Monocytes                               | Anti-CD11b APC                                                     | BD Biosciences    | 09546                  |
| Monocytes, granulocytes                 | Anti-CD16 FITC                                                     | BD Biosciences    | 555406                 |
| Granulocytes and eosinophils            | Anti-CD49d APC                                                     | BD Biosciences    | 559881                 |
| T cells                                 | Anti-CD4 FITC                                                      | BD Biosciences    | 555346                 |
| T cells                                 | Anti-CD8 APC                                                       | BD Biosciences    | 555369                 |
| T cells                                 | Anti-CD8 APCH7                                                     | BD Biosciences    | 561423                 |
| Dead cell stain                         | Sytox Blue                                                         | Life Technologies | S11348                 |
| Cell proliferation dye                  | CFSE                                                               | Life Technologies | C34554                 |
| NK cell activation                      | Golgistop                                                          | BD Biosciences    | 554754                 |
